# Supplementary material for: A comparative study of the photovoltaic performances of terpolymers and ternary systems
Source: Royal Society of Chemistry journal article supplement (doi:10.1039/c7ra01418j), 2017-01-01
Supplement: c7ra01418j1.pdf [file c7ra01418j1.pdf]

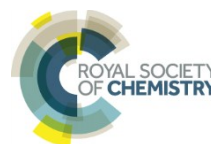

Journal Name

ARTICLE

## Electronic Supporting Information

### **A comparative study of the photovoltaic performances of terpolymers and ternary systems**

Zewdneh Genene,<sup>a,c</sup> Junyi Wang,<sup>b</sup> Xiaofeng Xu,<sup>c</sup> Renqiang Yang,<sup>\*b</sup> Wendimagegn Mammo,<sup>\*a</sup> and Ergang Wang<sup>\*c</sup>

<sup>a</sup>Department of Chemistry, Addis Ababa University, P.O. Box 33658, Addis Ababa, Ethiopia

E-mail: [wendimagegn.mammo@aau.edu.et](mailto:wendimagegn.mammo@aau.edu.et) (W.M.)

<sup>b</sup>CAS Key Laboratory of Bio-based Materials, Qingdao Institute of Bioenergy and Bioprocess Technology, Chinese Academy of Sciences, Qingdao 266101, China

E-mail: [yangrq@qibebt.ac.cn](mailto:yangrq@qibebt.ac.cn) (R.Y.)

<sup>c</sup>Department of Chemistry and Chemical Engineering, Chalmers University of Technology, SE-412 96 Göteborg, Sweden

E-mail: [ergang@chalmers.se](mailto:ergang@chalmers.se) (E.W.)

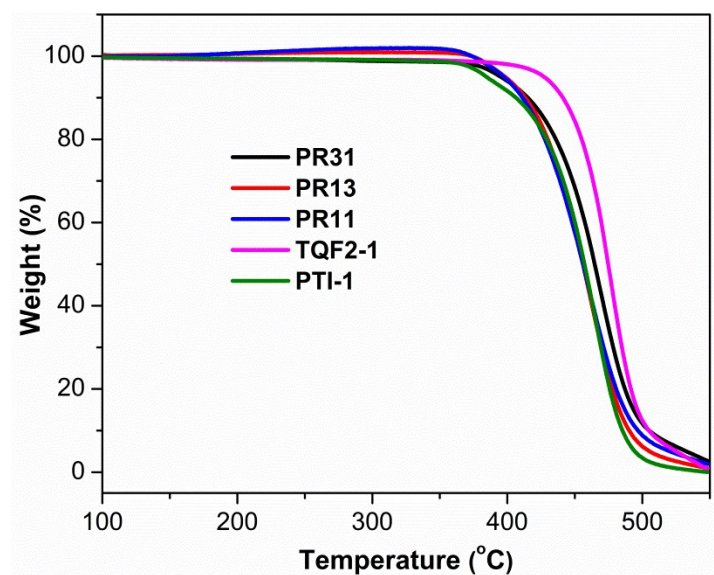

**Fig. S1** TGA plots of **TQF2-1**, **PTI-1** and terpolymers at a heating rate of 10 °C min<sup>-1</sup> under N<sub>2</sub> atmosphere.

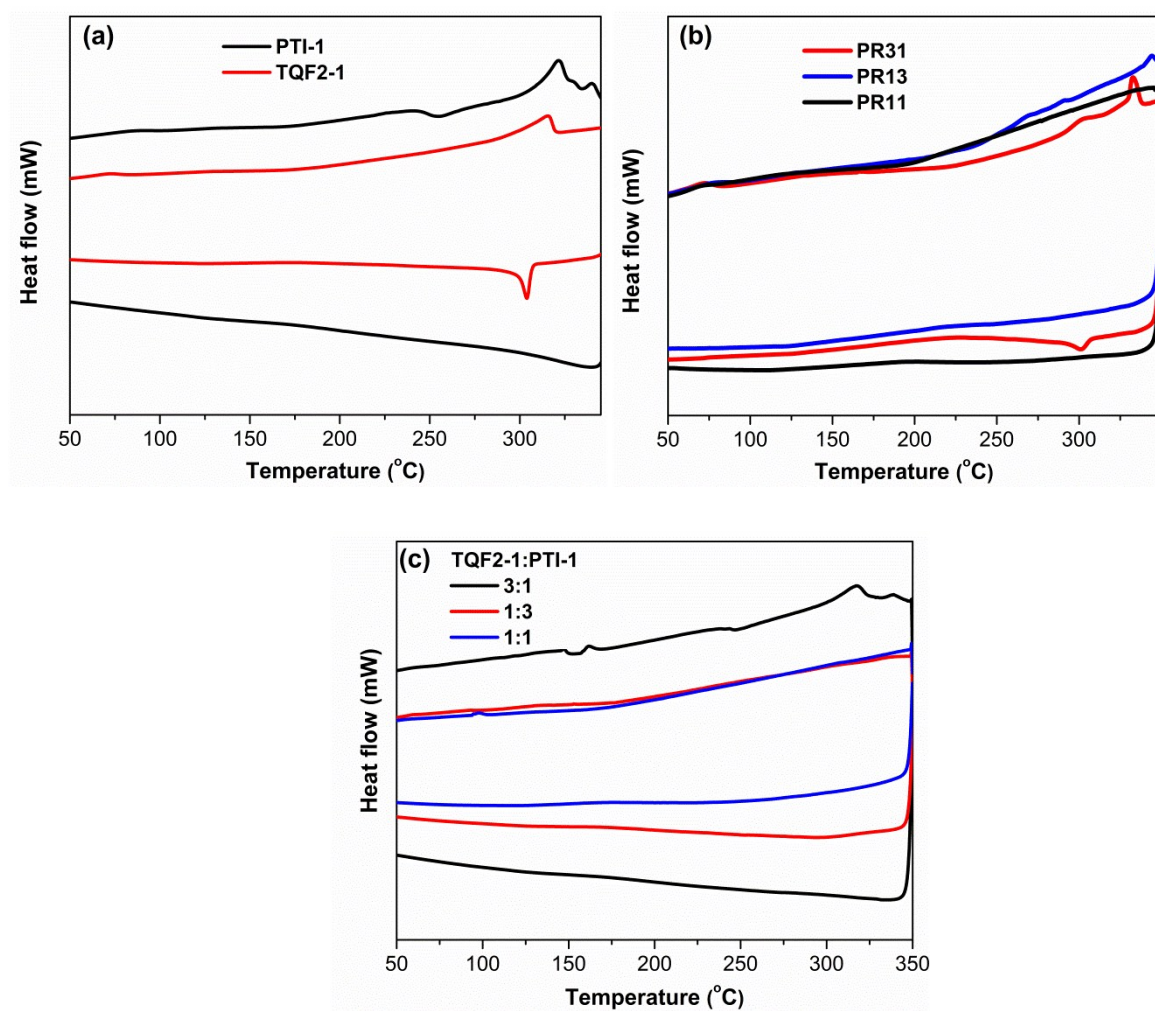

**Fig. S2** DSC curves of **TQF2-1**, and **PTI-1** (a), random terpolymers (b) and **TQF2-1: PTI-1** blends (c)

**Table S1** (a) Photovoltaic performance of **TQF2-1**:PC<sub>61</sub>BM PSCs with different D:A ratios

| <b>TQF2-1</b> :PC <sub>61</sub> BM | $V_{oc}$<br>(V) | $J_{sc}$<br>(mA/cm <sup>2</sup> ) | FF   | PCE<br>(%) |
|------------------------------------|-----------------|-----------------------------------|------|------------|
| 1:1                                | 0.91            | 6.2                               | 0.48 | 2.7        |
| 1:2                                | 0.95            | 4.2                               | 0.46 | 1.8        |
| 1:3                                | 1.00            | 3.6                               | 0.53 | 1.9        |
| 1:1 <sup>a</sup>                   | 0.93            | 8.5                               | 0.58 | 4.6        |

<sup>a</sup> with DIO 2.5%

(b) Photovoltaic performance of **PR31**:PC<sub>61</sub>BM PSCs with different D:A ratios

| D:A ratio        | $V_{oc}$<br>(V) | $J_{sc}$<br>(mA cm <sup>-2</sup> ) | FF   | PCE<br>(%) |
|------------------|-----------------|------------------------------------|------|------------|
| 1:1              | 0.99            | 7.2                                | 0.43 | 3.1        |
| 1:2              | 0.96            | 6.2                                | 0.55 | 3.3        |
| 1:3              | 0.98            | 3.7                                | 0.60 | 2.2        |
| 1:2 <sup>a</sup> | 0.92            | 8.6                                | 0.66 | 5.2        |
| 1:1 <sup>a</sup> | 0.94            | 9.4                                | 0.62 | 5.5        |

<sup>a</sup> with 2% DIO

(c) Photovoltaic performance of **PR13**: PC<sub>61</sub>BM PSCs with different D:A ratios

| D:A ratio        | $V_{oc}$<br>(V) | $J_{sc}$<br>(mA cm <sup>-2</sup> ) | FF   | PCE<br>(%) |
|------------------|-----------------|------------------------------------|------|------------|
| 1:1              | 0.97            | 4.6                                | 0.40 | 1.8        |
| 1:2              | 0.98            | 5.1                                | 0.63 | 3.1        |
| 1:3              | 0.96            | 3.4                                | 0.65 | 2.1        |
| 1:2 <sup>a</sup> | 0.94            | 8.2                                | 0.68 | 5.2        |
| 1:1 <sup>a</sup> | 0.95            | 10.8                               | 0.57 | 5.8        |

<sup>a</sup> with 2% DIO

(d) Photovoltaic performance of **PR11**:PC<sub>61</sub>BM PSCs with different D:A ratios

| D:A ratio        | $V_{oc}$<br>(V) | $J_{sc}$<br>(mA cm <sup>-2</sup> ) | FF   | PCE<br>(%) |
|------------------|-----------------|------------------------------------|------|------------|
| 1:1              | 0.96            | 3.8                                | 0.35 | 1.3        |
| 1:2              | 0.97            | 4.5                                | 0.59 | 2.6        |
| 1:3              | 0.96            | 3.4                                | 0.49 | 1.6        |
| 1:2 <sup>a</sup> | 0.95            | 4.6                                | 0.65 | 2.8        |
| 1:1 <sup>a</sup> | 0.92            | 7.6                                | 0.57 | 4.0        |

<sup>a</sup> with 2% DIO
